# Supplementary material for: Morphological dependence on the addition of a soft middle block segment to rigid POSS-containing triblock copolymers for forming cylindrical nanostructures
Source: Royal Society of Chemistry journal article supplement (doi:10.1039/c6ra11113k), 2016-01-01
Supplement: c6ra11113k3.pdf [file c6ra11113k3.pdf]

## Electronic supplementary information (ESI)

# Morphological Dependence on the Addition of a Soft Middle Block Segment to Rigid POSS- containing Triblock Copolymers for Forming Cylindrical Nanostructures

Fuminobu Kato,<sup>a</sup> Alvin Chandra,<sup>a</sup> Shin Horiuchi,<sup>b</sup> and Teruaki Hayakawa<sup>\*a,c</sup>

<sup>a</sup> Department of Materials Science and Engineering, School of Materials and Chemical Technology, Tokyo Institute of Technology, 2-12-1-S8-36 Ookayama, Meguro-ku, Tokyo 152-8552, Japan.

<sup>b</sup> Nanomaterials Research Institute, National Institute of Advanced Industrial Science and Technology (AIST), Tsukuba 305-8565, Japan

<sup>c</sup> Precursory Research for Embryonic Science and Technology (PREST), Japan Science and Technology Agency (JST), 4-1-8 Honcho, Kawaguchi, Saitama 332-0012, Japan

**Table S1.** Summary of Molecular Weight, Molecular Weight Distribution and volume fraction of PMAPOSS in PMMA-*b*-PMAPOSS.

| Polymer <sup>a</sup>                                  | $M_n$<br>(g/mol) <sup>b</sup> | $M_w/M_n$ | PMAPOSS<br>(vol%) <sup>c</sup> | Polymer <sup>a</sup>                                 | $M_n$<br>(g/mol) <sup>b</sup> | $M_w/M_n$ | PMAPOSS<br>(vol%) <sup>c</sup> |
|-------------------------------------------------------|-------------------------------|-----------|--------------------------------|------------------------------------------------------|-------------------------------|-----------|--------------------------------|
| PMMA <sub>604</sub> - <i>b</i> -PMAPOSS <sub>7</sub>  | 65 700                        | 1.04      | 7                              | PMMA <sub>57</sub> - <i>b</i> -PMAPOSS <sub>14</sub> | 18 600                        | 1.05      | 70                             |
| PMMA <sub>450</sub> - <i>b</i> -PMAPOSS <sub>7</sub>  | 51 700                        | 1.06      | 13                             | PMMA <sub>34</sub> - <i>b</i> -PMAPOSS <sub>11</sub> | 11 800                        | 1.07      | 71                             |
| PMMA <sub>178</sub> - <i>b</i> -PMAPOSS <sub>8</sub>  | 23 500                        | 1.07      | 20                             | PMMA <sub>35</sub> - <i>b</i> -PMAPOSS <sub>35</sub> | 12 500                        | 1.11      | 72                             |
| PMMA <sub>324</sub> - <i>b</i> -PMAPOSS <sub>15</sub> | 43 800                        | 1.03      | 22                             | PMMA <sub>37</sub> - <i>b</i> -PMAPOSS <sub>13</sub> | 13 300                        | 1.07      | 72                             |
| PMMA <sub>165</sub> - <i>b</i> -PMAPOSS <sub>7</sub>  | 21 500                        | 1.09      | 23                             | PMMA <sub>52</sub> - <i>b</i> -PMAPOSS <sub>16</sub> | 20 200                        | 1.06      | 74                             |
| PMMA <sub>221</sub> - <i>b</i> -PMAPOSS <sub>10</sub> | 29 900                        | 1.07      | 26                             | PMMA <sub>32</sub> - <i>b</i> -PMAPOSS <sub>10</sub> | 12 800                        | 1.04      | 75                             |
| PMMA <sub>171</sub> - <i>b</i> -PMAPOSS <sub>8</sub>  | 23 500                        | 1.07      | 27                             | PMMA <sub>41</sub> - <i>b</i> -PMAPOSS <sub>14</sub> | 17 000                        | 1.04      | 76                             |
| PMMA <sub>159</sub> - <i>b</i> -PMAPOSS <sub>6</sub>  | 20 200                        | 1.07      | 30                             | PMMA <sub>41</sub> - <i>b</i> -PMAPOSS <sub>14</sub> | 17 000                        | 1.04      | 76                             |
| PMMA <sub>74</sub> - <i>b</i> -PMAPOSS <sub>6</sub>   | 12 100                        | 1.05      | 32                             | PMMA <sub>50</sub> - <i>b</i> -PMAPOSS <sub>25</sub> | 23 700                        | 1.05      | 79                             |
| PMMA <sub>154</sub> - <i>b</i> -PMAPOSS <sub>5</sub>  | 18 900                        | 1.07      | 33                             | PMMA <sub>29</sub> - <i>b</i> -PMAPOSS <sub>16</sub> | 14 600                        | 1.03      | 80                             |
| PMMA <sub>77</sub> - <i>b</i> -PMAPOSS <sub>7</sub>   | 13 000                        | 1.05      | 41                             | PMMA <sub>27</sub> - <i>b</i> -PMAPOSS <sub>17</sub> | 15 200                        | 1.05      | 82                             |
| PMMA <sub>81</sub> - <i>b</i> -PMAPOSS <sub>9</sub>   | 15 000                        | 1.05      | 46                             | PMMA <sub>19</sub> - <i>b</i> -PMAPOSS <sub>10</sub> | 10 900                        | 1.07      | 83                             |
| PMMA <sub>78</sub> - <i>b</i> -PMAPOSS <sub>11</sub>  | 16 000                        | 1.06      | 51                             | PMMA <sub>20</sub> - <i>b</i> -PMAPOSS <sub>10</sub> | 11 700                        | 1.09      | 83                             |
| PMMA <sub>162</sub> - <i>b</i> -PMAPOSS <sub>18</sub> | 32 800                        | 1.06      | 51                             | PMMA <sub>17</sub> - <i>b</i> -PMAPOSS <sub>9</sub>  | 10 500                        | 1.05      | 84                             |
| PMMA <sub>63</sub> - <i>b</i> -PMAPOSS <sub>9</sub>   | 13 200                        | 1.03      | 52                             | PMMA <sub>17</sub> - <i>b</i> -PMAPOSS <sub>10</sub> | 10 800                        | 1.05      | 84                             |
| PMMA <sub>86</sub> - <i>b</i> -PMAPOSS <sub>7</sub>   | 15 700                        | 1.04      | 55                             | PMMA <sub>18</sub> - <i>b</i> -PMAPOSS <sub>11</sub> | 12 100                        | 1.05      | 85                             |
| PMMA <sub>88</sub> - <i>b</i> -PMAPOSS <sub>12</sub>  | 20 500                        | 1.07      | 57                             | PMMA <sub>22</sub> - <i>b</i> -PMAPOSS <sub>18</sub> | 15 900                        | 1.06      | 86                             |
| PMMA <sub>271</sub> - <i>b</i> -PMAPOSS <sub>27</sub> | 47 000                        | 1.06      | 58                             | PMMA <sub>19</sub> - <i>b</i> -PMAPOSS <sub>20</sub> | 16 900                        | 1.05      | 89                             |
| PMMA <sub>54</sub> - <i>b</i> -PMAPOSS <sub>10</sub>  | 13 200                        | 1.06      | 59                             | PMMA <sub>14</sub> - <i>b</i> -PMAPOSS <sub>19</sub> | 15 600                        | 1.05      | 91                             |
| PMMA <sub>66</sub> - <i>b</i> -PMAPOSS <sub>14</sub>  | 17 000                        | 1.04      | 61                             | PMMA <sub>17</sub> - <i>b</i> -PMAPOSS <sub>22</sub> | 17 800                        | 1.06      | 91                             |
| PMMA <sub>48</sub> - <i>b</i> -PMAPOSS <sub>11</sub>  | 13 300                        | 1.04      | 64                             | PMMA <sub>11</sub> - <i>b</i> -PMAPOSS <sub>17</sub> | 13 500                        | 1.05      | 92                             |
| PMMA <sub>104</sub> - <i>b</i> -PMAPOSS <sub>21</sub> | 30 000                        | 1.10      | 66                             | PMMA <sub>14</sub> - <i>b</i> -PMAPOSS <sub>21</sub> | 16 900                        | 1.05      | 92                             |
| PMMA <sub>108</sub> - <i>b</i> -PMAPOSS <sub>28</sub> | 31 800                        | 1.05      | 66                             | PMMA <sub>12</sub> - <i>b</i> -PMAPOSS <sub>26</sub> | 20 800                        | 1.05      | 94                             |
| PMMA <sub>40</sub> - <i>b</i> -PMAPOSS <sub>10</sub>  | 12 000                        | 1.05      | 67                             |                                                      |                               |           |                                |

<sup>a</sup> Degree of polymerization was determined from the gel permeation chromatography (GPC) and integration from <sup>1</sup>H NMR spectra. <sup>b</sup> The molecular weight of polymers was determined by GPC. <sup>c</sup> Volume fractions of PMAPOSS calculated from integration from <sup>1</sup>H-NMR spectra.

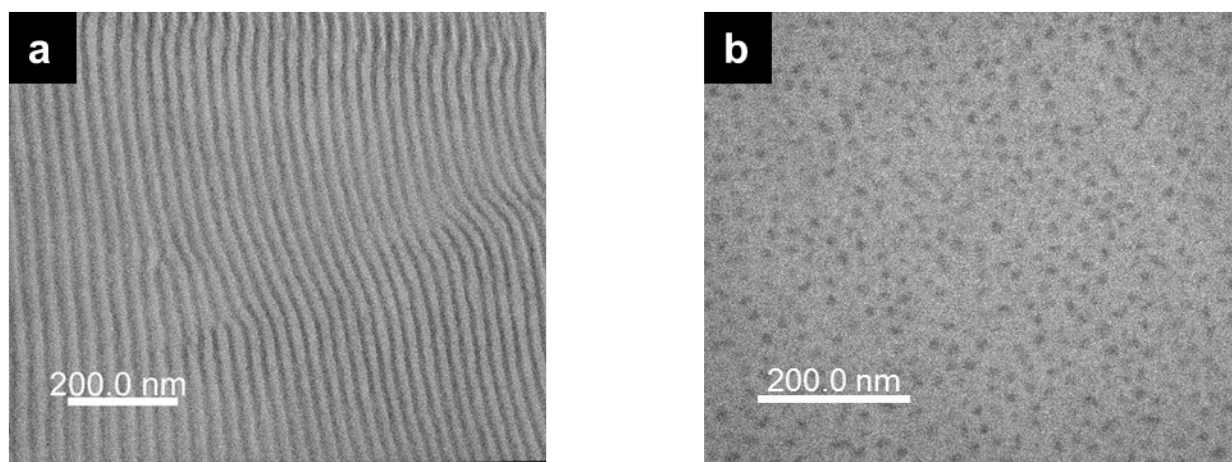

**Fig. S1.** TEM images of PMMA-*b*-PMAPOSS bulk samples. Volume fractions of PMAPOSS domain are (a) 22 vol% and (b) 7 vol%.

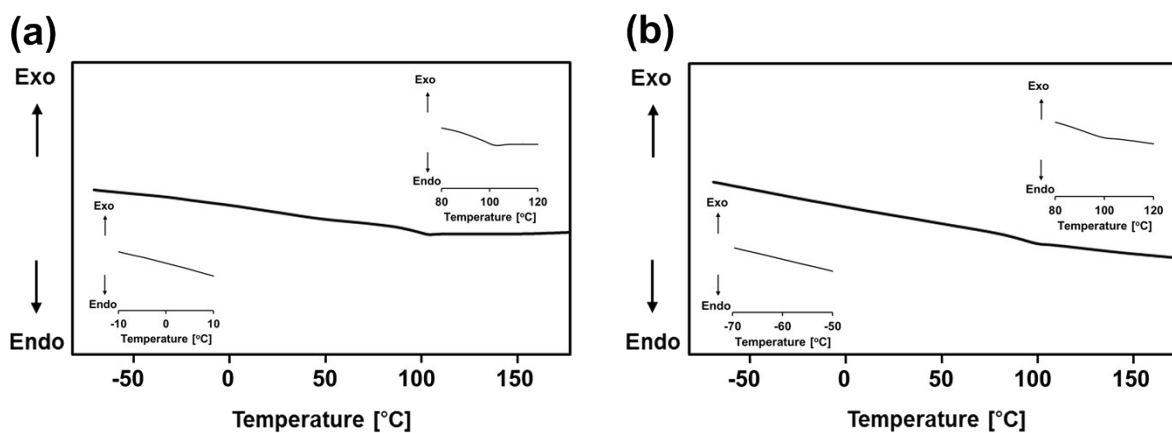

**Fig. S2.** DSC curves at the heating cycles of (a) PS<sub>200</sub>-*b*-(1,2-*ran*-3,4-PI)<sub>13</sub>-*b*-PMAPOSS<sub>12</sub> and (b) PS<sub>266</sub>-*b*-(1,4-PI)<sub>23</sub>-*b*-PMAPOSS<sub>13</sub>.

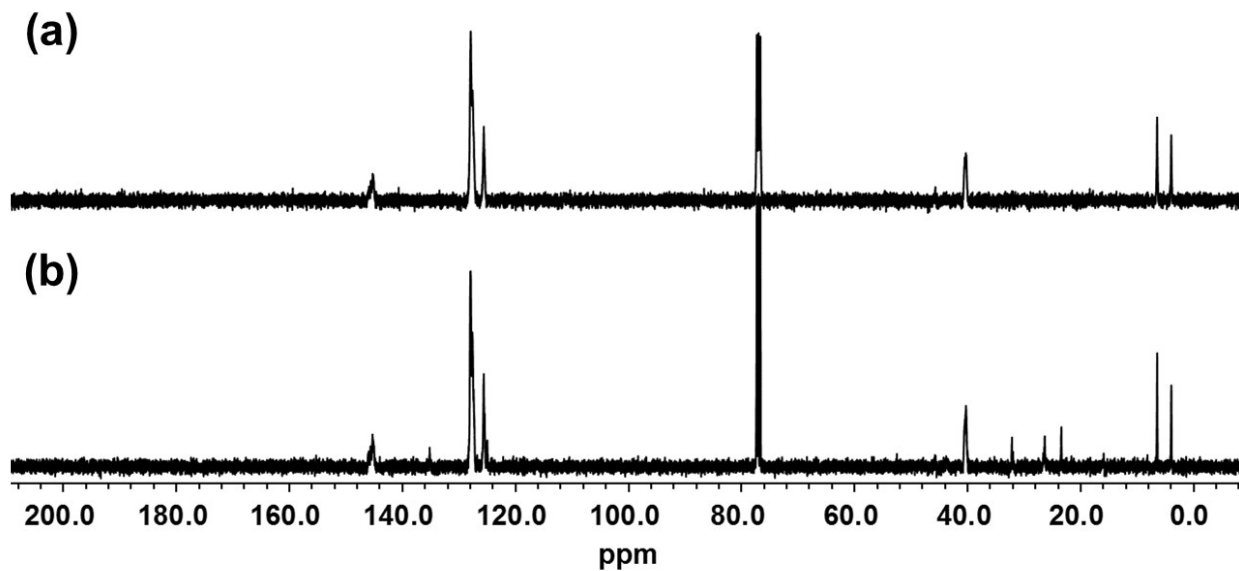

**Fig. S3.** <sup>13</sup>C-NMR spectra of (a) PS<sub>200</sub>-*b*-(1,2-*ran*-3,4-PI)<sub>13</sub>-*b*-PMAPOSS<sub>12</sub> and (b) PS<sub>266</sub>-*b*-(1,4-PI)<sub>23</sub>-*b*-PMAPOSS<sub>13</sub>.

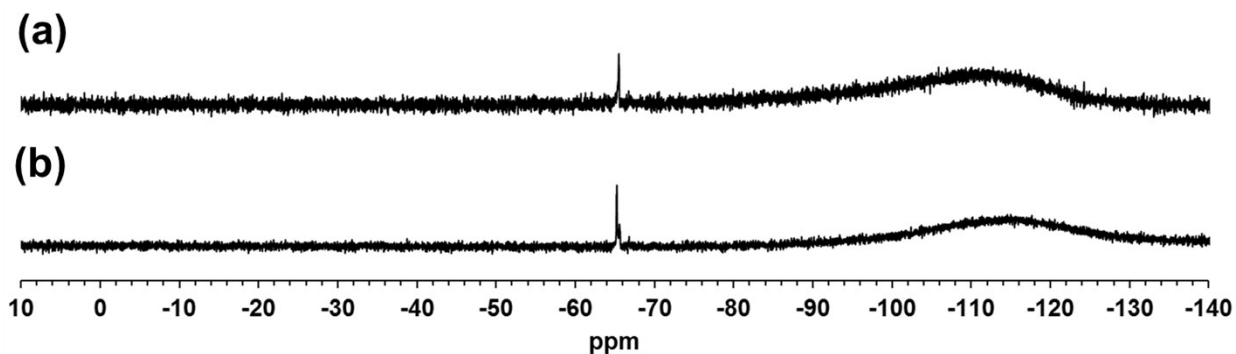

**Fig. S4.** <sup>29</sup>Si-NMR spectra of (a) PS<sub>200</sub>-*b*-(1,2-*ran*-3,4-PI)<sub>13</sub>-*b*-PMAPOSS<sub>12</sub> and (b) PS<sub>266</sub>-*b*-(1,4-PI)<sub>23</sub>-*b*-PMAPOSS<sub>13</sub>.

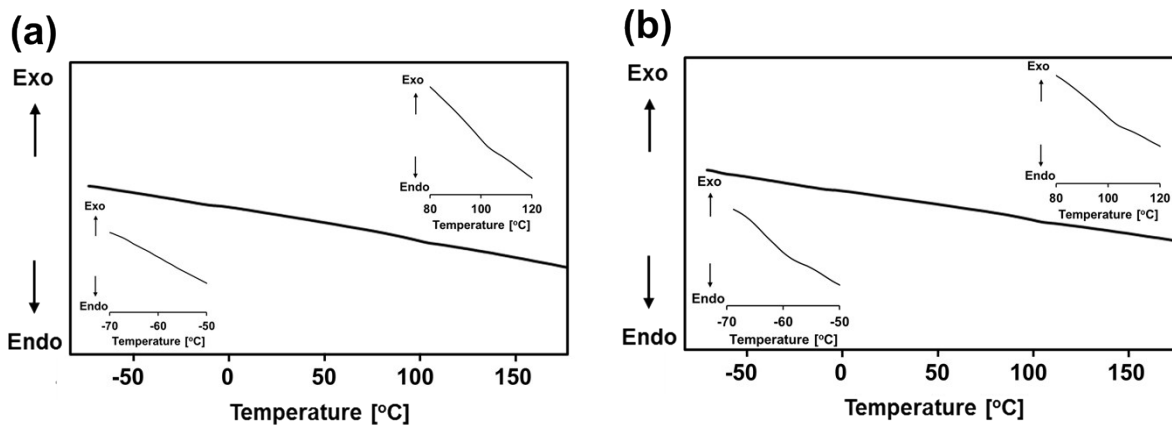

**Fig. S5.** DSC curves at the heating cycles of (a) PS<sub>337</sub>-*b*-(1,4-PI)<sub>59</sub>-*b*-PMAPOSS<sub>15</sub> and (b) PS<sub>336</sub>-*b*-(1,4-PI)<sub>131</sub>-*b*-PMAPOSS<sub>21</sub>.
